# Supplementary material for: Unveiling the Protein Components of the Secretory-Venom Gland and Venom of the Scorpion Centruroides possanii (Buthidae) through Omic Technologies
Source: MDPI journal article supplement (doi:10.3390/toxins15080498), 2023-08-09
Supplement: s1 [file s1]

# Supplementary Materials: Unveiling the Protein Components of the Secretory-Venom Gland and Venom of the Scorpion *Centruroides possanii* (Buthidae) through Omic Technologies

Patricia Elizabeth GarcíaVillalvazo, Juana María Jiménez-Vargas, Gisela Jareth Lino-López, Erika P. Meneses, Manuel J. Bermúdez-Guzmán, Carlos Eduardo Barajas-Saucedo, Iván Delgado Enciso, Lourival D. Possani and Laura Leticia Valdez-Velazquez

Table S3. Molecular weights (MW) of the venom components from *C. possanii*. A total of 180 MW was found. A dimer of 7274.18 molecular mass is shown in red text. The values < 3500 Da are monoisotopic masses, and >3500 Da are average masses.

| RT (min) | MW (Da)                                                                                                                                  | RT (min) | MW (Da)                                                                                                                                                                                                                                                                                                                                                                           |
|----------|------------------------------------------------------------------------------------------------------------------------------------------|----------|-----------------------------------------------------------------------------------------------------------------------------------------------------------------------------------------------------------------------------------------------------------------------------------------------------------------------------------------------------------------------------------|
| 0-30     | 1357.70, 1438.57, 2138.03, 2411.09,<br>2720.08, 3907.76,<br>4044.71, 4269.72                                                             | 90-100   | 814.46, 840.46, 845.42,<br>852.40, 862.38, 876.46,<br>942.54, 1198.60, 1486.92,<br>1573.76, 1870.06, 1975.18,<br>2768.07, 2841.36, 3294.71,<br>3420.31, 3955.82, 4018.24,<br>4037.81, 4113.98, 4224.01,<br>4237.96, 4306.01, 4784.12,<br>4828.90, 5596.57, 6589.94,<br>6907.16, 6946.17, 6963.15,<br>7116.16, 7126.15, 7165.31,<br>7338.20, 7576.64, 7675.36,<br>7745.50, 7847.63 |
|          |                                                                                                                                          |          | 1530.80, 1681.77, 1967.16,<br>2426.39, 2788.67, 3479.55,<br>3583.66, 3810.88, 4047.71,<br>4072.77, 4111.96, 4240.98,<br>5162.38, 5588.57, 6195.64,<br>6332.62, 6350.81, 6385.34,<br>6464.85, 6972.05, 7109.98,<br>7153.12, 7228.12, 7237.18,<br>7247.76, 7577.37, 7971.24,<br>8244.82                                                                                             |
| 30-40    | 1318.62, 1415.70, 1446.54,<br>1594.76, 1756.80, 2557.18,<br>2719.08, 2826.40, 3246.90,<br>3827.70, 3875.69, 4022.53,<br>4070.80, 7353.24 | 100-110  | 1167.74, 1547.49, 2927.75,<br>3128.64, 6088.96, 6217.12,<br>6602.10, 6971.12, 7143.40,<br>7239.77, 7264.30, 7268.31,<br><b>7274.18</b> , 7332.16, 7372.13,<br>7466.33, 7468.72, 7841.47,<br><b>14550.39</b>                                                                                                                                                                       |
| 40-50    | 3819.69, 5384.17, 5559.89,<br>5902.71, 6469.78, 7145.05,<br>7743.53, 9150.13                                                             | 100-120  | 1735.76, 1855.80, 1877.80,<br>2323.35, 2435.45, 2747.70,                                                                                                                                                                                                                                                                                                                          |
| 50-70    | 966.58, 1019.59, 1030.44,<br>1163.75, 1348.73, 1670.93,                                                                                  | 120-130  |                                                                                                                                                                                                                                                                                                                                                                                   |

|       |                                                                                                                                                                                 |         |                                                                                                                                                           |
|-------|---------------------------------------------------------------------------------------------------------------------------------------------------------------------------------|---------|-----------------------------------------------------------------------------------------------------------------------------------------------------------|
|       | 2112.02, 2134.00, 2192.91,<br>2483.24, 2516.04, 2527.03,<br>2541.03, 2837.31, 3418.29,<br>3894.74, 3952.80, 4014.66,<br>4035.77, 4109.95, 4225.83,<br>4303.04, 4506.43, 4825.87 |         | 3629.05, 3651.63, 3779.39,<br>5386.45, 5932.50, 6470.74,<br>7048.99, 7231.12, 7380.15,<br>7551.39, 7579.44, 7746.54,<br>9094.08, 9144.17                  |
| 70-90 | 1060.49, 1417.70, 1489.79, 4235.72,<br>6397.75                                                                                                                                  | 130-150 | 1607.72, 1971.31, 2185.12, 5564.36,<br>5678.44, 6197.83, 6689.20, 7277.17,<br>7399.38, 7462.04, 7637.75, 7748.60,<br>9180.07, 9550.00, 10880.16, 16096.96 |
